# Supplementary material for: Carbon isotope discrimination as a diagnostic tool for C4 photosynthesis in C3-C4 intermediate species
Source: PubMed Central journal article supplement (PMC4867892; doi:10.1093/jxb/erv555), 2016-02-08
Supplement: supp_erv555_supplementary_figures_S1_S3.pdf [file supp_erv555_supplementary_figures_S1_S3.pdf]

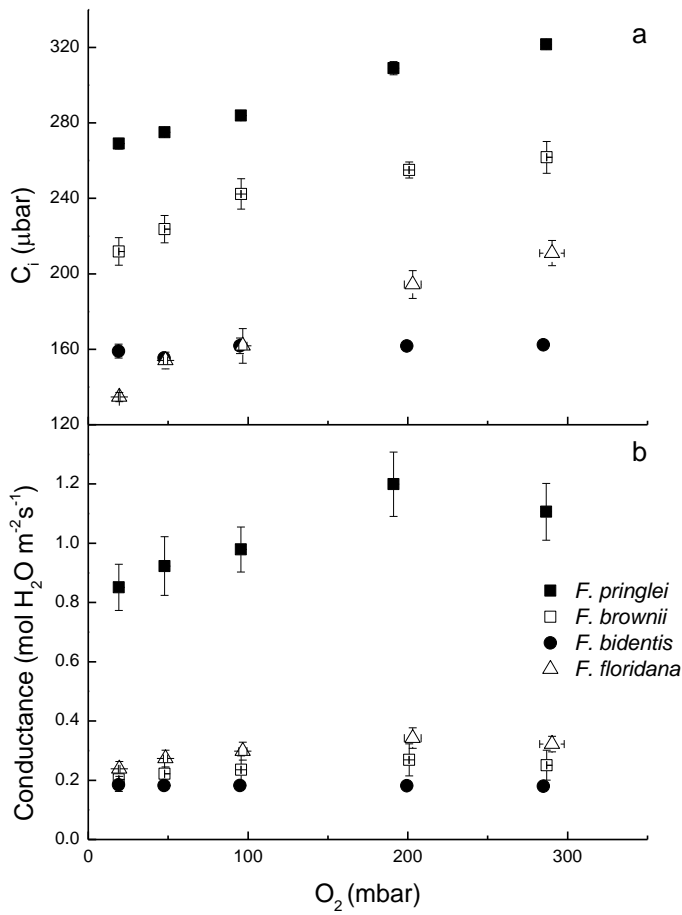

**Figure S1.**

The responses of  $C_i$  (a) and stomatal conductance (b) in *F. pringlei*, *F. floridana*, *F. brownii* and *F. bidentis* to changes in atmospheric  $pO_2$ . Results correspond to the same measurements as Fig. 1a. Values represent averages and standard error of 4 replicates.

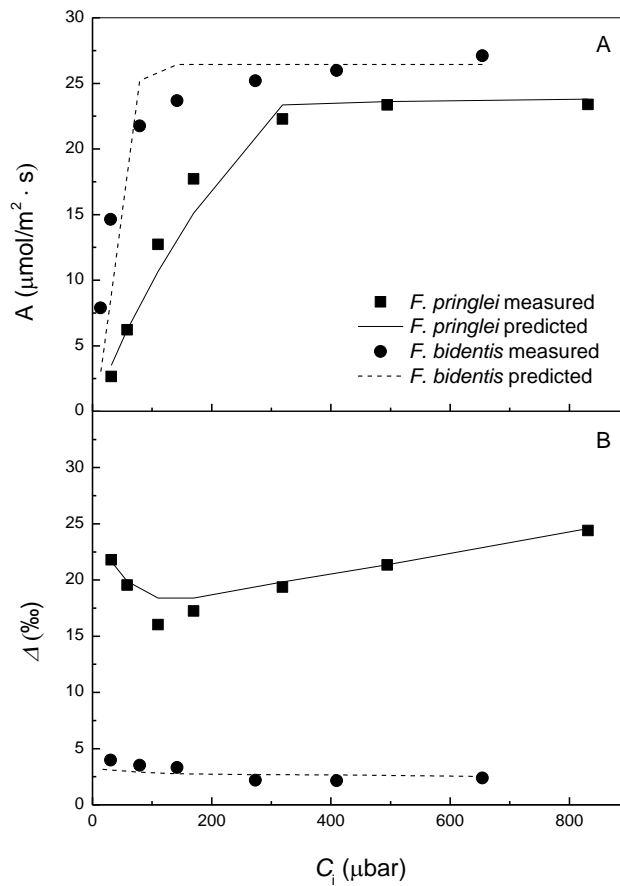

**Figure S2.**

Models of CO<sub>2</sub> response of assimilation rate and carbon isotope discrimination in the C<sub>3</sub> and C<sub>4</sub> species. **(a)** Measured CO<sub>2</sub> response of *A* in *F. pringlei* and *F. bidentis*, compared with the predicted responses. **(b)** Measured CO<sub>2</sub> response of  $\Delta$  in *F. pringlei* and *F. bidentis*, compared with the predicted responses. Parameters used for modelling are presented in Table 1.

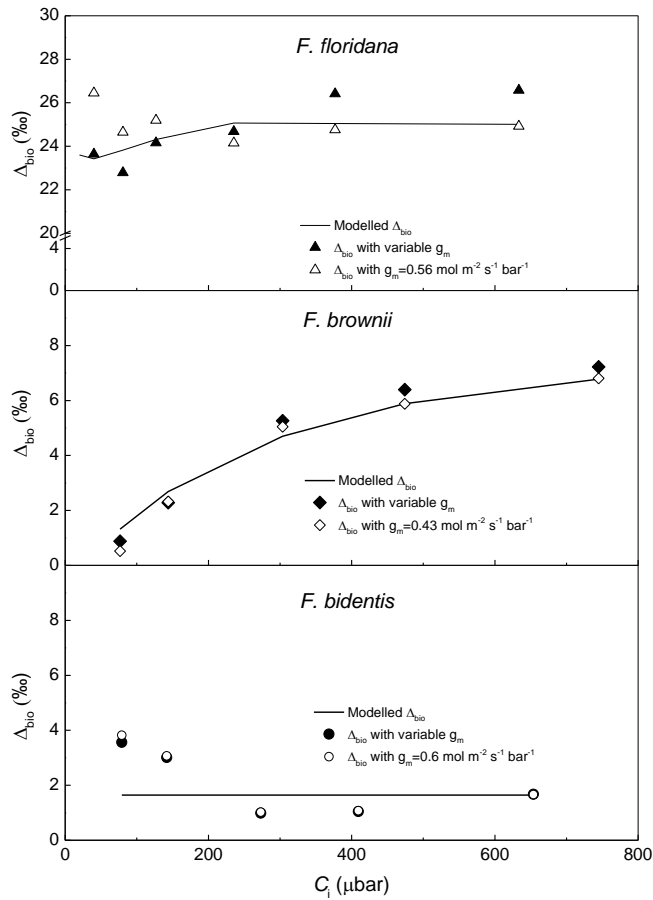

**Figure S3.**

The effect of assuming constant or variable  $g_m$  in the calculation of the biochemical fractionation ( $\Delta_{\text{bio}}$ ) in *F. floridana*, *F. brownii* and *F. bidentis*.  $\Delta_{\text{bio}}$  was calculated from eq. 12 using gas exchange and  $\Delta$  measurements, and assuming constant (open symbols) or variable  $g_m$  (solid symbols). The variable  $g_m$  values applied are shown in Fig. 6. Constant  $g_m$  is the average of the variable values obtained for each species. Modelled  $\Delta_{\text{bio}}$  (solid lines) was calculated from eq. 14 using the photosynthesis model with the parameters given in Table 1. *F. bidentis* is considered a strict  $C_4$ , thus modelled  $\Delta_{\text{bio}}$  is constant and independent from  $C_i$  and  $g_m$ .
